# Supplementary material for: Oxidative desulfurization pathway for complete catabolism of sulfoquinovose by bacteria
Source: PubMed Central journal article supplement — Proc Natl Acad Sci U S A. 2022 Jan 24;119(4):e2116022119. doi: 10.1073/pnas.2116022119 (PMC8795539; doi:10.1073/pnas.2116022119), 2022-01-24
Supplement: pnas.2116022119.sapp.pdf [file pnas.2116022119.sapp.pdf]

## Supplementary Information for

### Oxidative desulfurization pathway for complete catabolism of sulfoquinovose by bacteria

Mahima Sharma,<sup>1</sup> James P. Lingford,<sup>2,3</sup> Marija Petricevic,<sup>4,5</sup> Alexander J.D. Snow,<sup>1</sup> Yunyang Zhang,<sup>4,5</sup> Michael A. Järvå,<sup>2,3</sup> Janice W.-Y. Mui,<sup>4,5</sup> Nichollas E. Scott,<sup>6</sup> Eleanor C. Saunders,<sup>7</sup> Runyu Mao,<sup>2,3</sup> Ruwan Epa,<sup>4,5</sup> Bruna M. da Silva,<sup>7,8</sup> Douglas E.V. Pires,<sup>7,8</sup> David B. Ascher,<sup>5,7</sup> Malcolm J. McConville,<sup>7</sup> Gideon J. Davies,<sup>1\*</sup> Spencer J. Williams,<sup>4,5\*</sup> Ethan D. Goddard-Borger<sup>2,3\*</sup>

Gideon J. Davies

Email: [gideon.davies@york.ac.uk](mailto:gideon.davies@york.ac.uk)

Spencer J. Williams

Email: [sjwill@unimelb.edu.au](mailto:sjwill@unimelb.edu.au)

Ethan D. Goddard-Borger

Email: [goddard-borger.e@wehi.edu.au](mailto:goddard-borger.e@wehi.edu.au)

#### This PDF file includes:

Figures S1 to S20

Tables S1 to S6

## Supplementary Figures

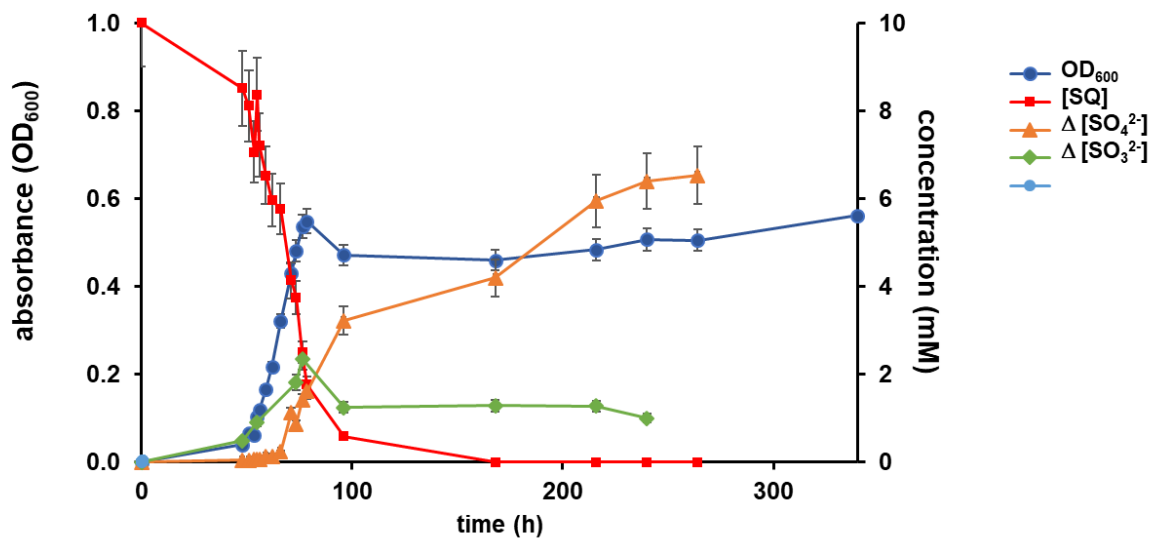

**Fig. S1:** Independent replicate of data in Figure 1a. Optical density of *A. tumefaciens* C58 culture (blue) and [SQ] (red), change in [sulfite] (green) and change in [sulfate] (yellow), with respect to time. Error bars denote observational error (derived by propagation of estimated random errors).

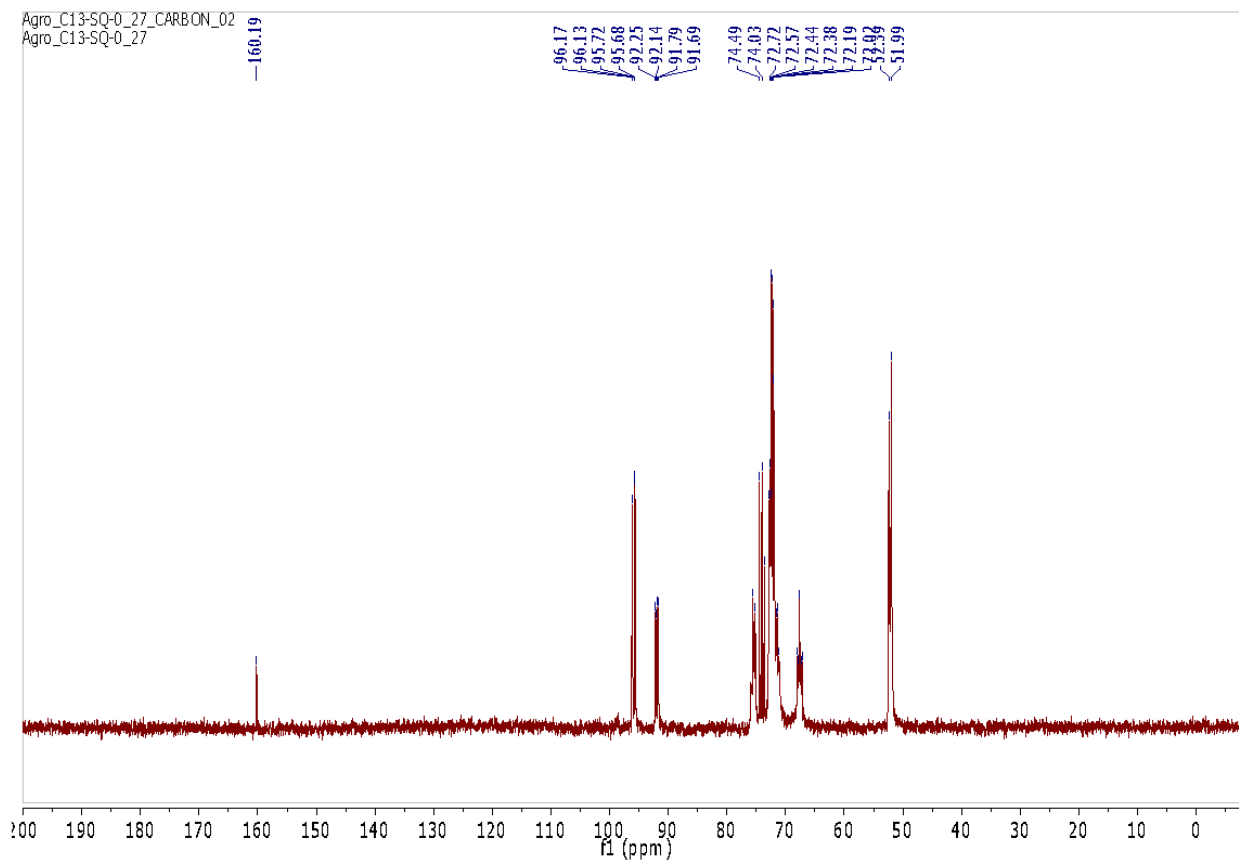

**Fig. S2:**  $^{13}\text{C}\{^1\text{H}\}$  NMR (100 MHz) spectrum of *A. tumefaciens* C58 culture grown on M9 media supplemented with 10 mM ( $^{13}\text{C}_6$ )SQ at an  $\text{OD}_{600}$  of 0.49.  $^{13}\text{C}$ -labelled bicarbonate is observed at  $\delta = 160.2$  ppm.

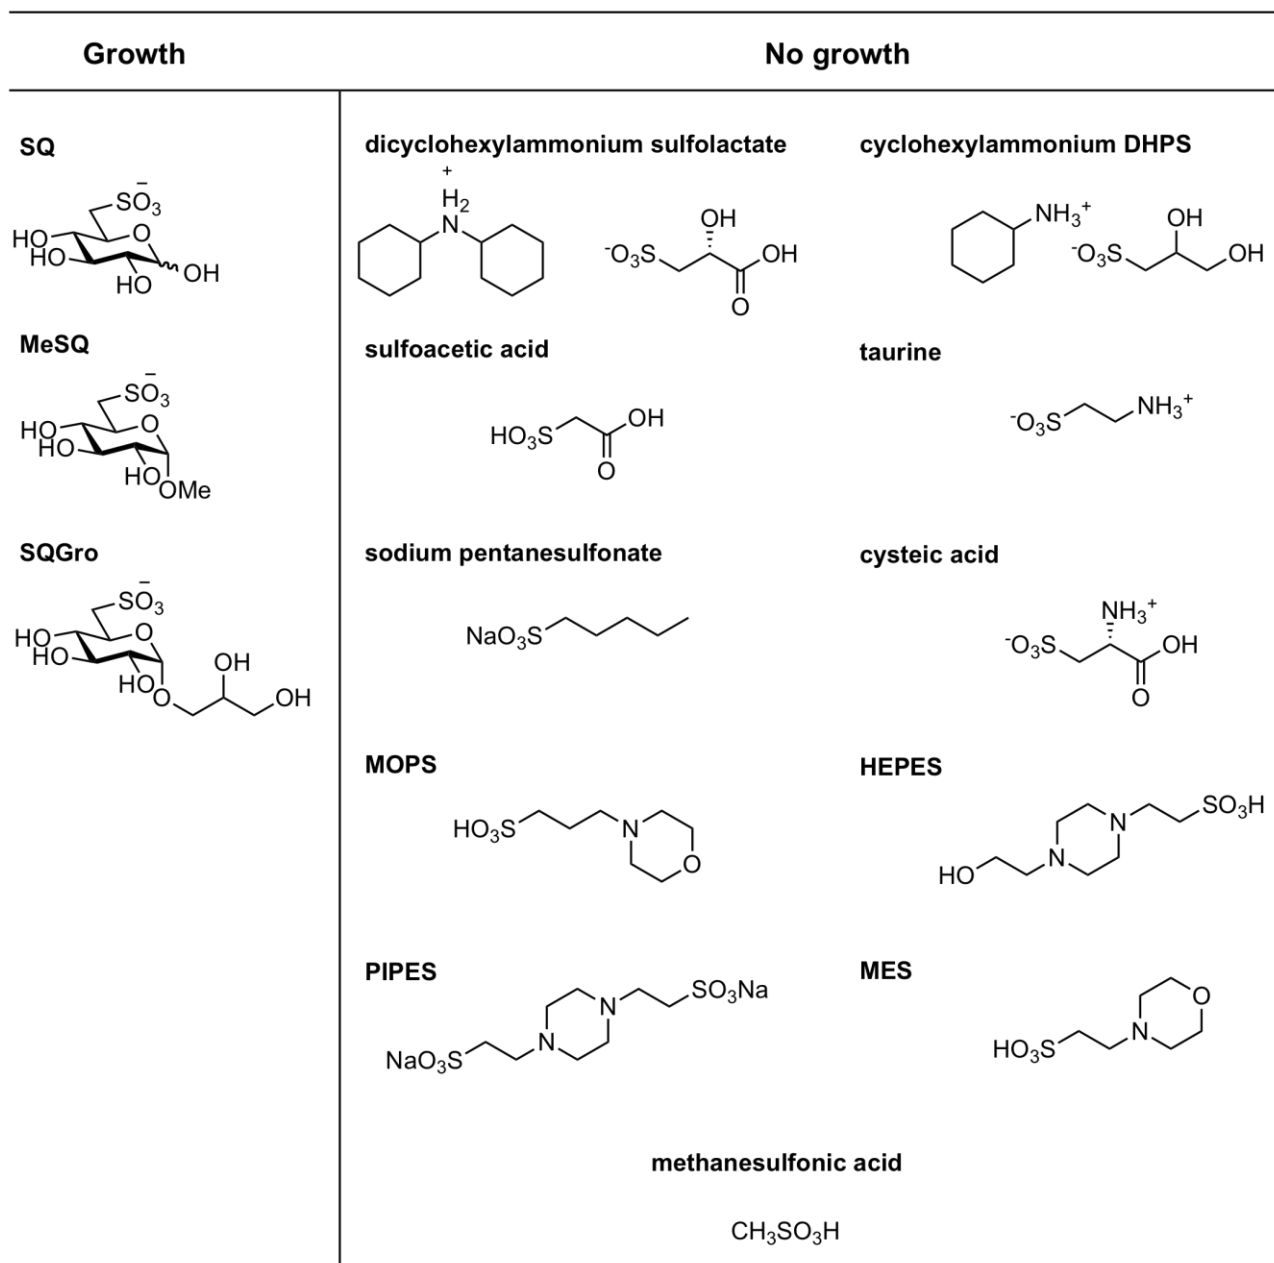

**Fig. S3:** Sulfonate substrates investigated as substrates for growth of *A. tumefaciens* C58 in M9 minimal media.

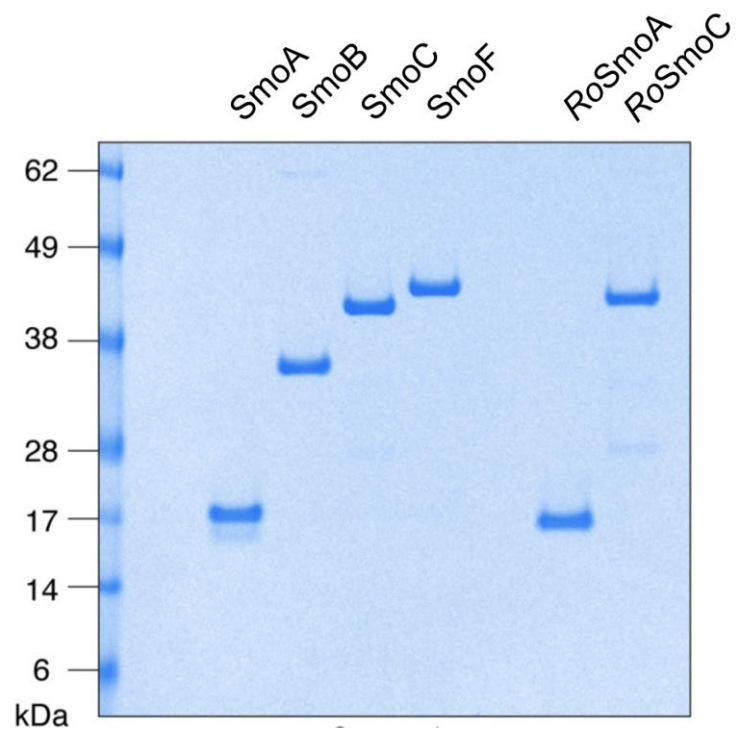

**Fig. S4:** Coomassie-stained SDS-PAGE gel of all recombinant proteins used in this study (5  $\mu$ g loaded per well).

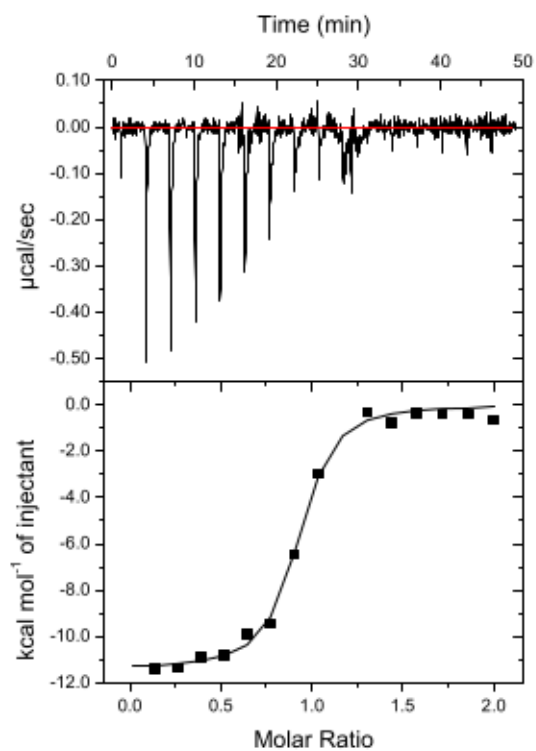

**Fig. S5:** Independent replicate of data in Figure 2a. Isothermal titration calorimogram for SmoF titrated against its cognate ligand 2'R-SQGro.

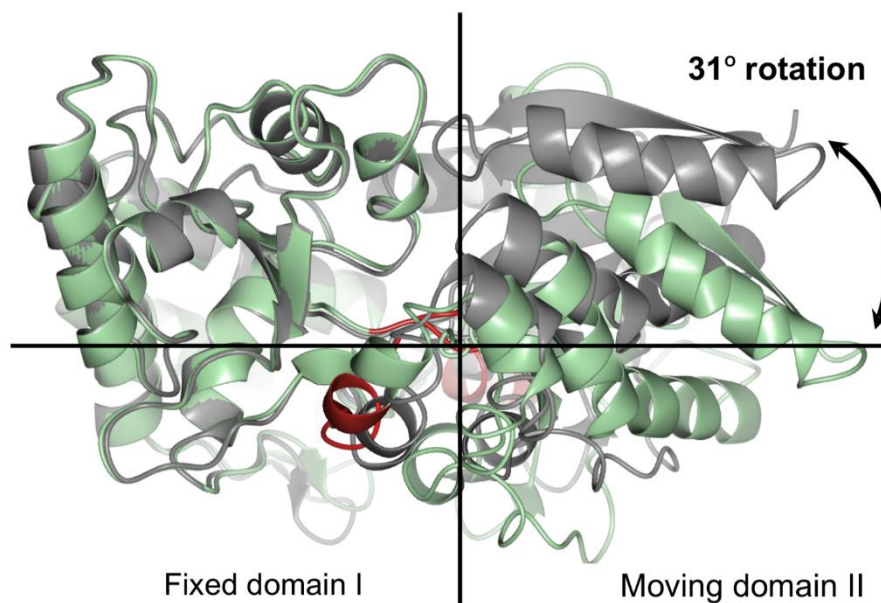

| Property                                     | Value                                    |
|----------------------------------------------|------------------------------------------|
| Fixed Domain (208 residues, r.m.s.d. 0.67 Å) | 72 - 75, 113 - 275, 343 - 387            |
| Moving Domain (168 residues, r.m.s.d. 1.87Å) | 4 - 71, 76 - 112, 276 - 342              |
| Rotation Angle (deg)                         | 30.6                                     |
| Translation (Å)                              | -0.5                                     |
| Closure (%)                                  | 99.7                                     |
| Bending Residues (red)                       | 71 - 76, 112 - 114, 273 - 276, 336 - 343 |

**Fig. S6: Conformational changes occurring upon binding of 2'R-SQGro to SmoF.** DynDom analysis of the dynamic domains and hinge-bending motion of the SmoF(Atu3282)-apo structure (green) vs. 2'R-SQGro•SmoF(Atu3282) complex structure in 'closed' conformation (grey). The *x* and *y* axes cross at the centre of rotation and the hinge (*z*) axis is perpendicular to the origin.

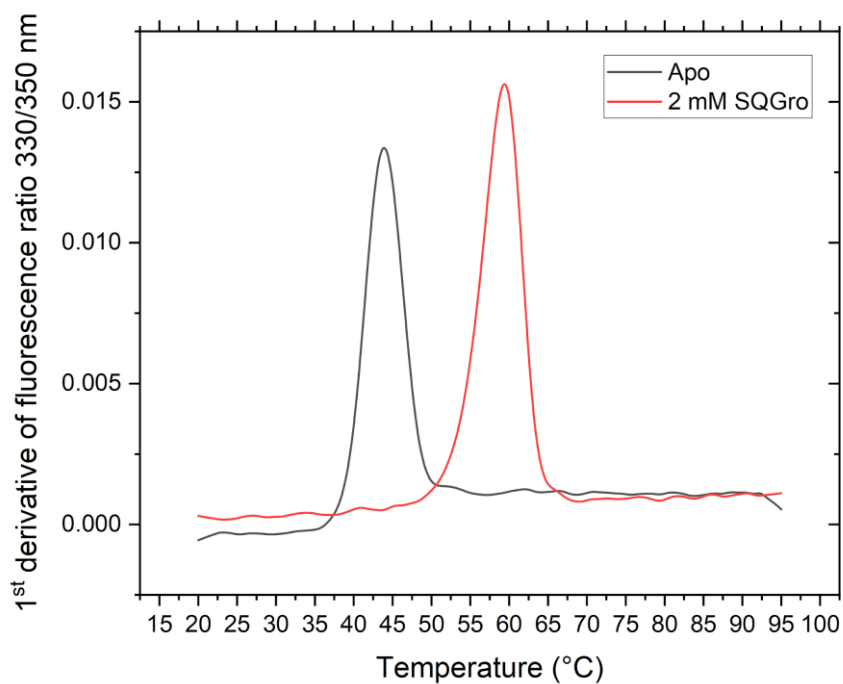

**Fig. S7: Thermal stability of SmoF in ligand-free state and with bound SQGro.** Differential scanning fluorimetry (DSF) was used to determine the melting temperature ( $T_m$ ) of SmoF in the presence and absence of SQGro. SQGro binding to SmoF increased the protein's  $T_m$  by 15.3 °C (from 43.9 °C to 59.2 °C).



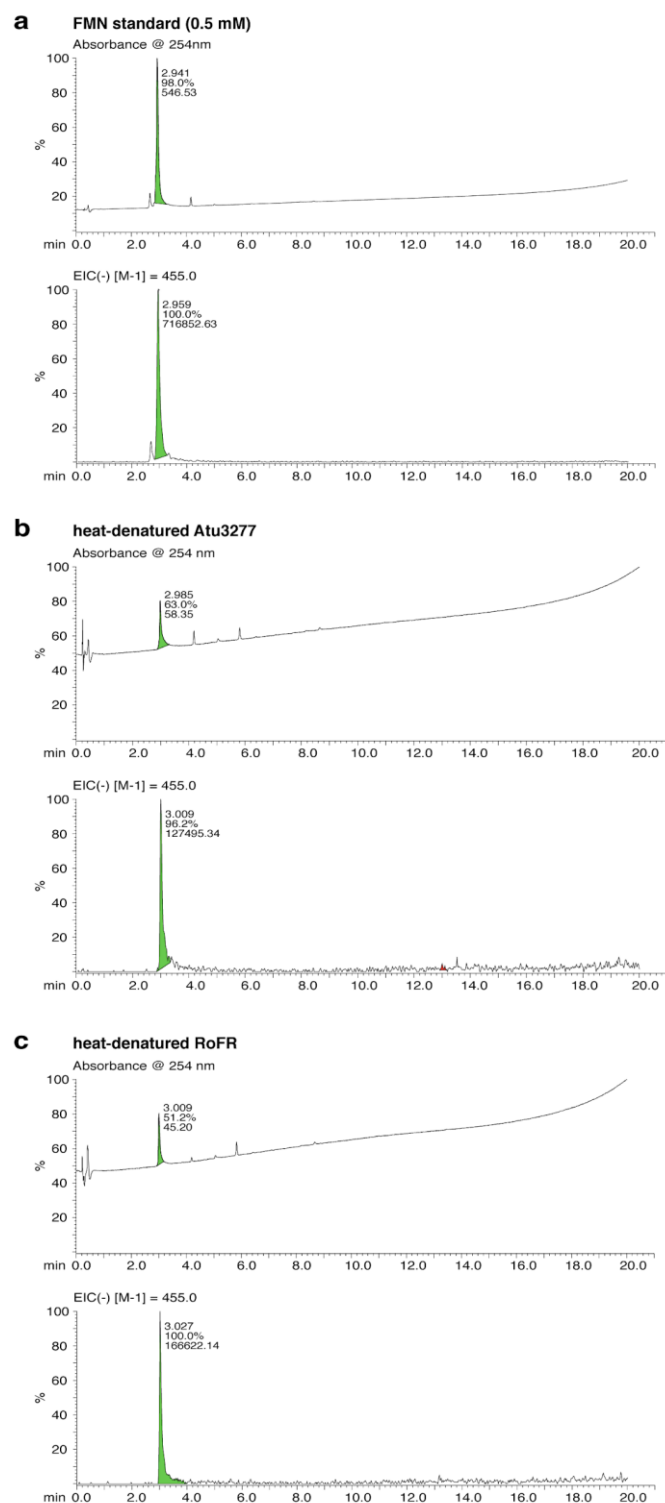

**Fig. S8: LC-MS analysis of the supernatant from heat-denatured samples of recombinant SmoA (Atu3277) and RoSmoA.** (a) Chromatograms showing absorbance and  $m/z$  455 signals for authentic FMN. (b) Chromatograms showing absorbance and  $m/z$  455 signals for heat-denatured SmoA. (c) Chromatograms showing absorbance and  $m/z$  455 signals for heat-denatured RoSmoA.

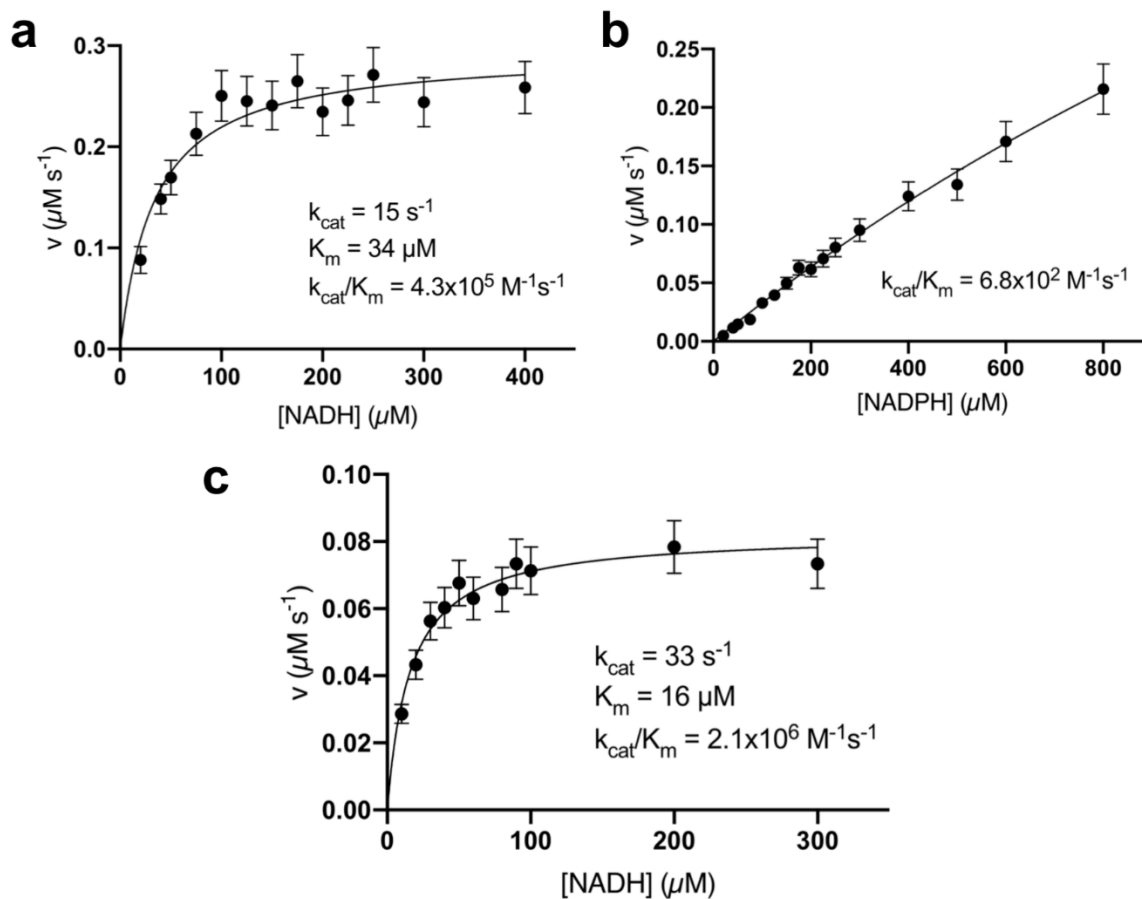

**Fig. S9: Kinetic analysis of SmoA and RoSmoA.** Michaelis-Menten kinetics for SmoA-catalysed reduction of FMN (at 30  $\mu\text{M}$ ) by (a) NADH and (b) NADPH, illustrating that NADH is the preferred nicotinamide cofactor for SmoA. (c) Michaelis-Menten kinetics for RoSmoA-catalysed reduction of FMN (at 30  $\mu\text{M}$ ) by NADH. Error bars denote observational errors (derived by propagation of estimated random error).

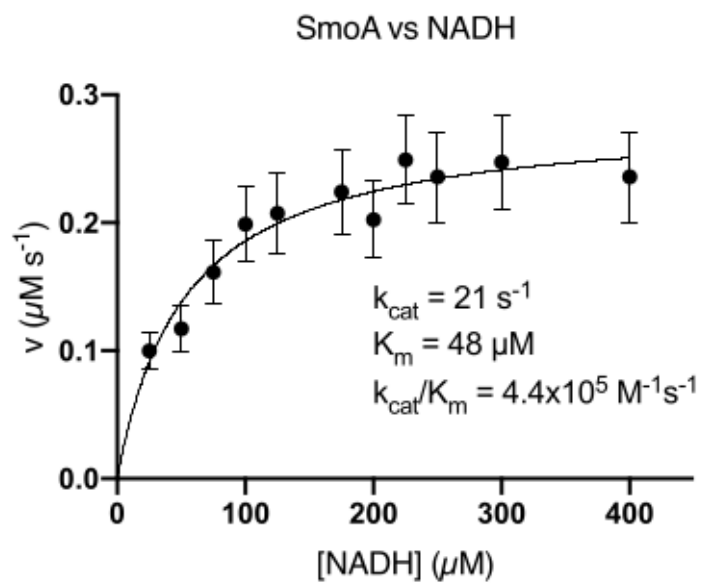

**Fig. S10: Independent replicate of data in Figure 3a.** Michaelis-Menten kinetics for SmoA-catalysed reduction of FMN by NADH. Error bars denote observational errors (derived by propagation of estimated random error).

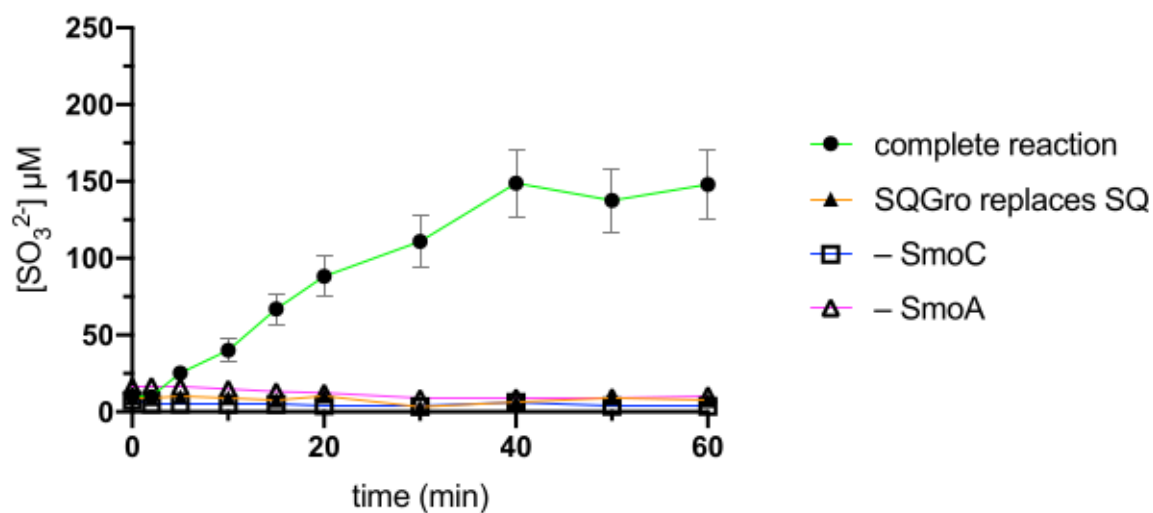

**Fig. S11: Independent replicate of data in Figure 3b.** SmoC activity assessed using sulfite release assay with Ellman's reagent in the presence of FMN, flavin reductase, NADH and SQ. The data is representative of three independent experiments, error bars denote observational error (derived by propagation of estimated random errors).

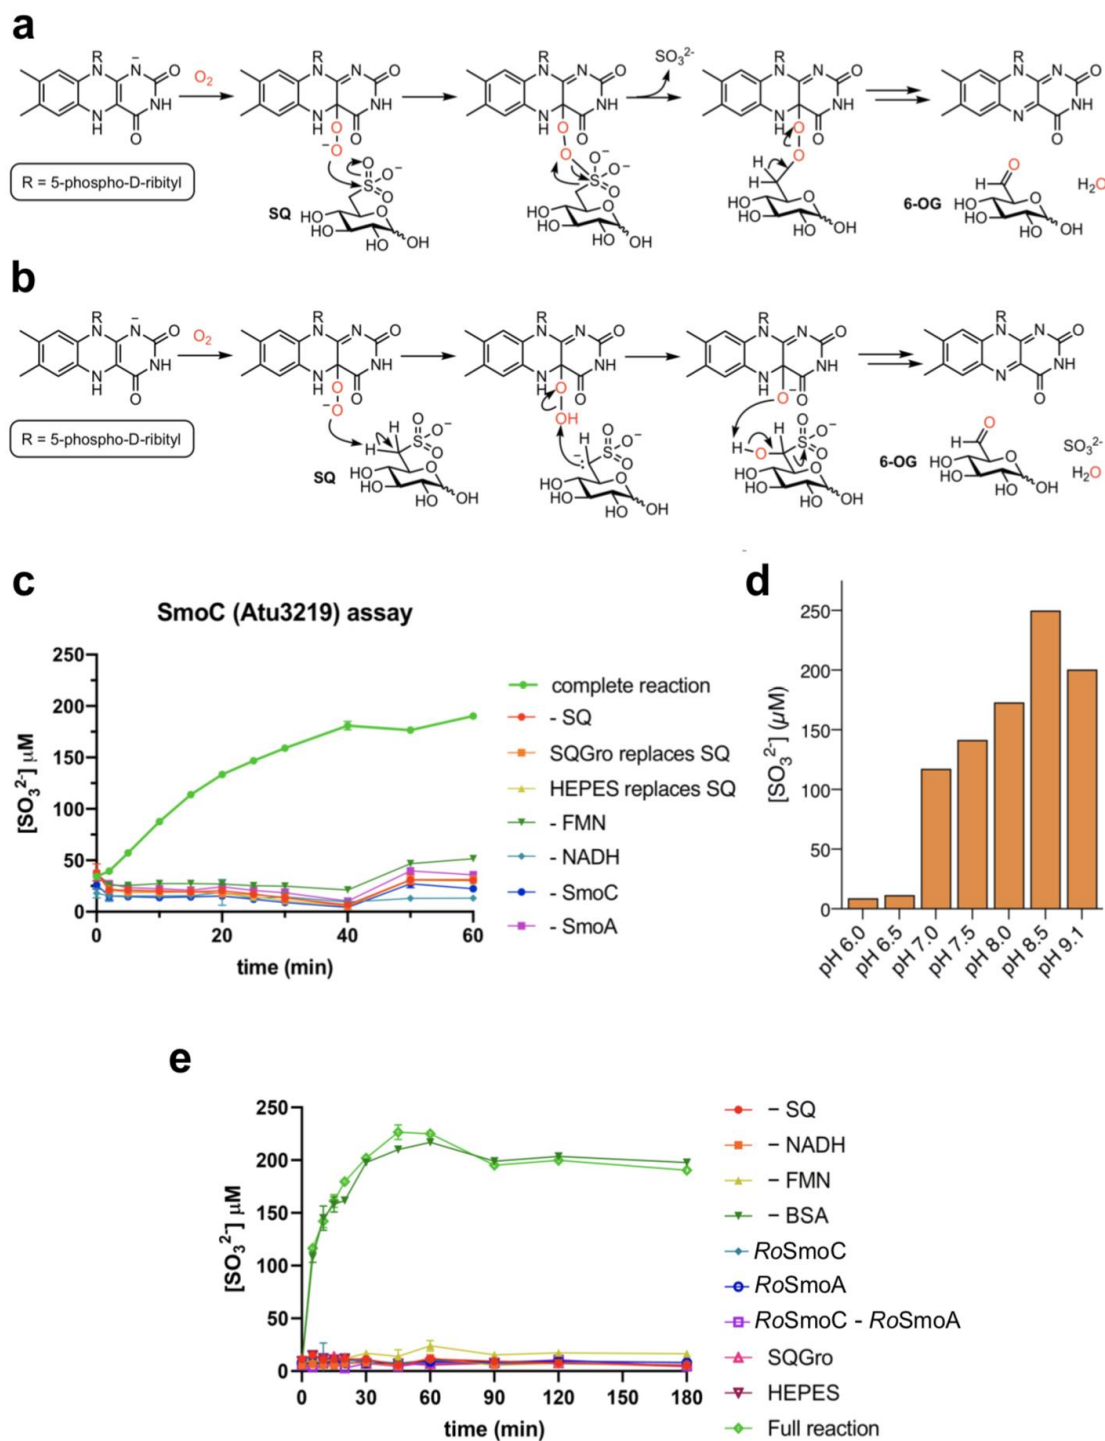

**Fig. S12: Proposed mechanisms and biochemical characterization of SmoC and RoSmoC.** (a) Proposed SQ monooxygenase mechanism involving nucleophilic attack at sulfur by a C4a-peroxide (alternatively, an N5-peroxide may be invoked). (b) Proposed SQ monooxygenase mechanism involving oxidation at C6 of SQ (alternatively, an N5-peroxide may be invoked). (c) Sulfite release assay using Ellman's reagent to quantify SmoC activity in absence (–) or presence of FMN, flavin reductase (SmoA), NADH and SQ (extended controls). (d) pH profile for SmoC-catalyzed desulfurization of SQ. (e) Sulfite release assay using Ellman's reagent to quantify RoSmoC activity in presence of FMN, flavin reductase (RoSmoA), NADH and SQ, as well as other controls.

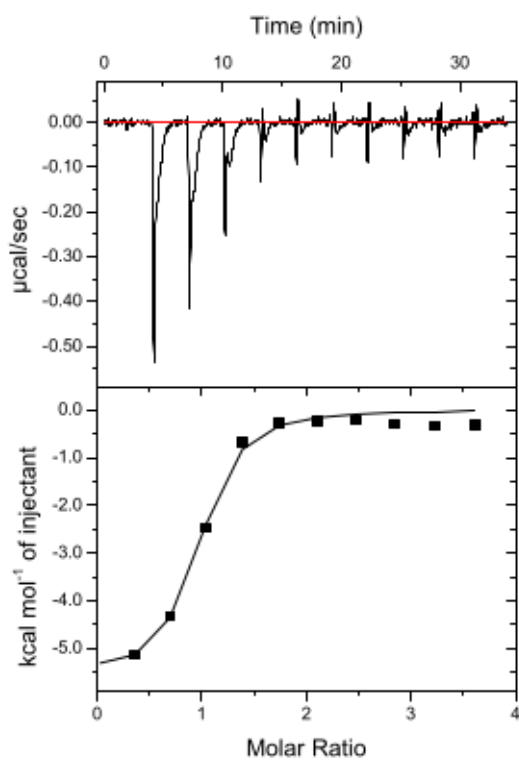

**Fig. S13: Independent replicate of data in Figure 3c.** Isothermal titration calorimogram of interaction of SmoC with SQ as determined by ITC.

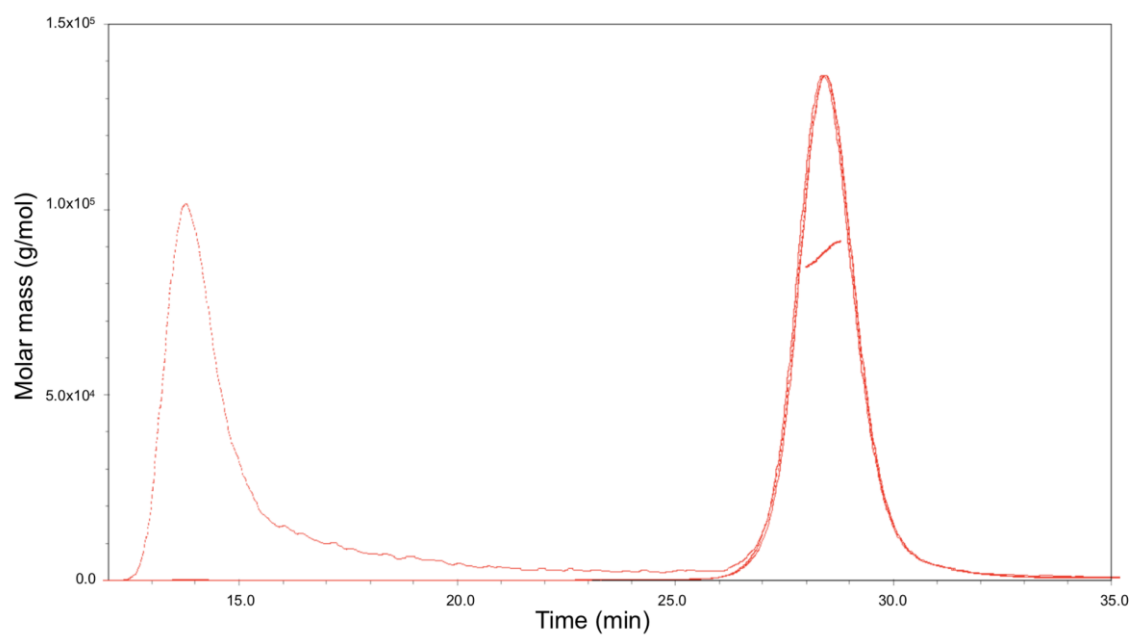

| Peak             | from (min) | to (min) | Amount ( $\mu\text{g}$ ) | MW (kDa) |
|------------------|------------|----------|--------------------------|----------|
| Major Peak (99%) | 26.00      | 28.80    | 373                      | 88.1     |

**Fig. S14: SEC-MALS for SmoC.** Molar mass plots show the light scatter trace as a solid red line, the refractive index trace (concentration measurement) as a dashed red line, and the UV trace as a dotted red line, normalised to the largest peak.

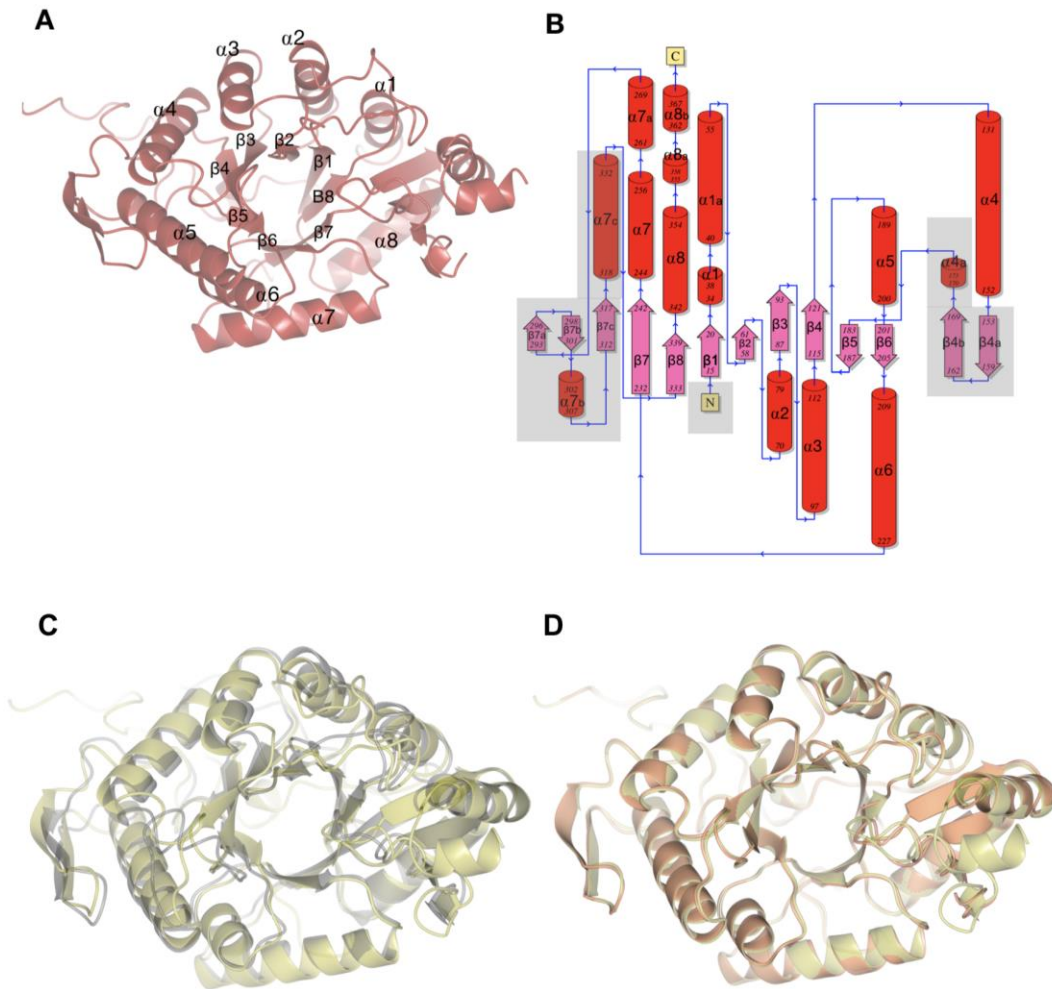

**Fig. S15: Ribbon and topology diagrams of *RoSmoC*.** (a) Ribbon diagram of the *RoSmoC* monomer showing  $(\alpha/\beta)_8$  TIM barrel fold. (b) Secondary structure arrangement of *RoSmoC* depicted in topology diagram showing  $(\alpha/\beta)_8$  TIM barrel fold with additional inserts highlighted in grey (generated using the PDBsum server). (c) Overlay of *RoSmoC* subunit A (in gold) with SsuD (PDB ID: 1M41, in grey): the peptide backbones have an r.m.s.d. of 1.3 Å. (d) Overlay of *RoSmoC* subunit A (in gold) with SmoC (At3279) (in coral): the peptide backbones have an r.m.s.d. of 0.4 Å.



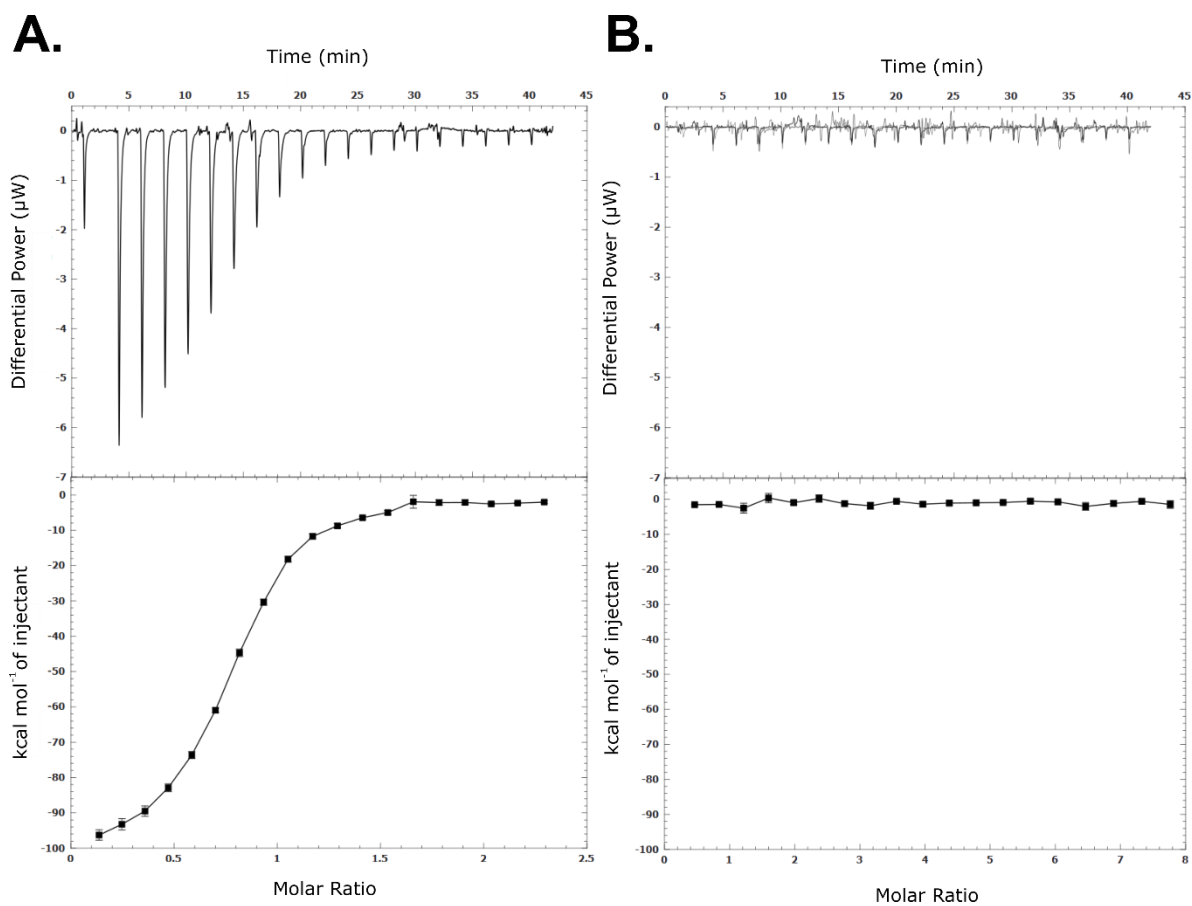

**Fig. S16: Isothermal Titration Calorimetry for addition of NAD(P)H to recombinant SmoB.** (a) Unprocessed heat and molar ratio plots of SmoB with NADPH. (b) Unprocessed heat and molar ratio plots of SmoB with NADH.

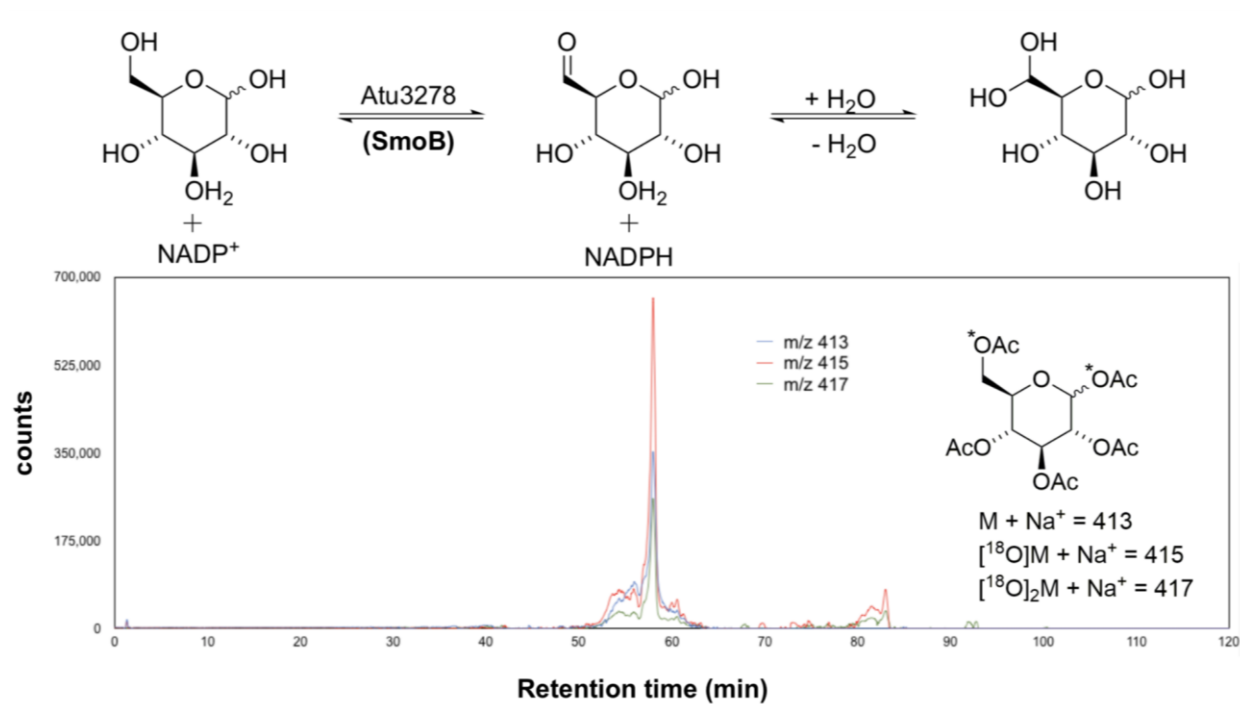

**Fig. S17: SmoB (Atu3278) catalyzes formation of <sup>18</sup>O<sub>2</sub>-labelled glucose.** Extracted ion chromatogram from LC-MS analysis of glucose incubated with SmoB and NADP<sup>+</sup> in H<sub>2</sub><sup>18</sup>O followed by peracetylation.

Normal abundance:

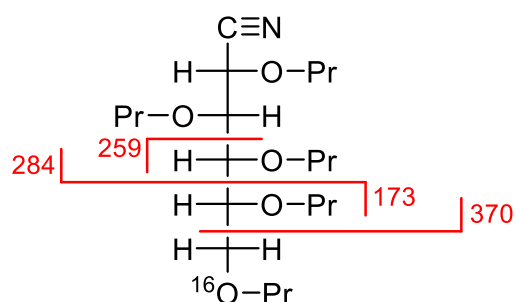

C6-<sup>18</sup>O-labelled:

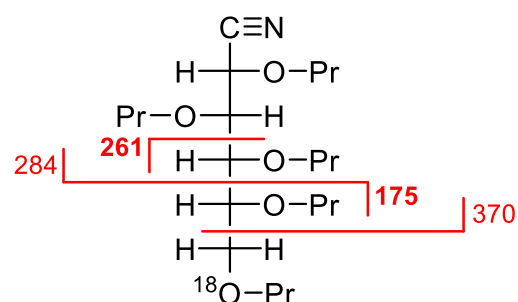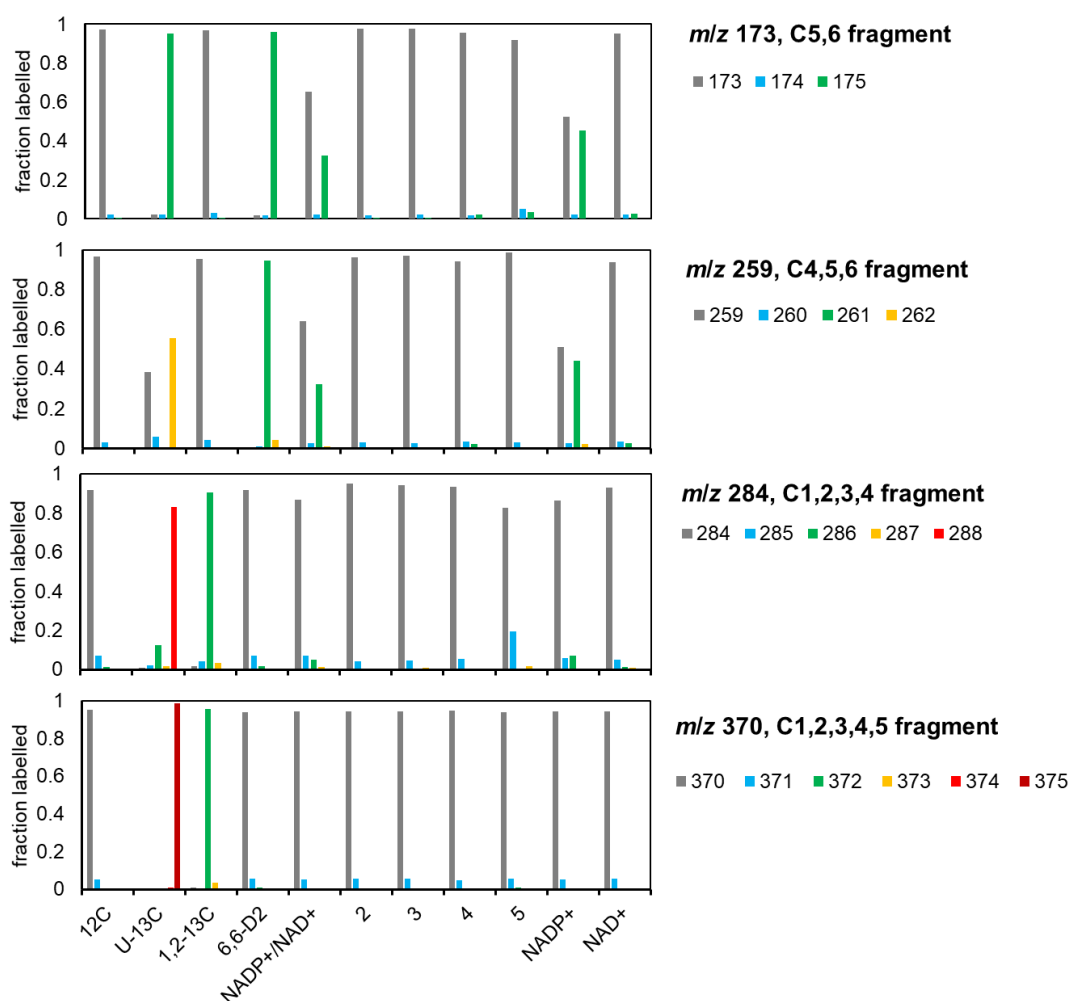

**Fig. S18: Identification of <sup>18</sup>O-labelled glucose. (Top)** Structure of aldonitrile pentapropionate glucose and predicted *m/z* values for key fragments involving <sup>18</sup>O incorporation at C6. **(Bottom)** Fraction of labelled fragments derived from incubation with SmoB and various control experiments, corrected for isotope natural abundance by DExSI analysis for 2.5 nmol of analysed glucose. Standards include: <sup>12</sup>C<sub>6</sub>-glucose, <sup>13</sup>C<sub>6</sub>-glucose, 1,2-<sup>13</sup>C<sub>2</sub>-glucose, 6,6-<sup>2</sup>H<sub>2</sub>-glucose. Only reactions containing enzyme, substrate and NADP<sup>+</sup> gave M+4 product and labelling consistent with introduction of <sup>18</sup>O at C6.

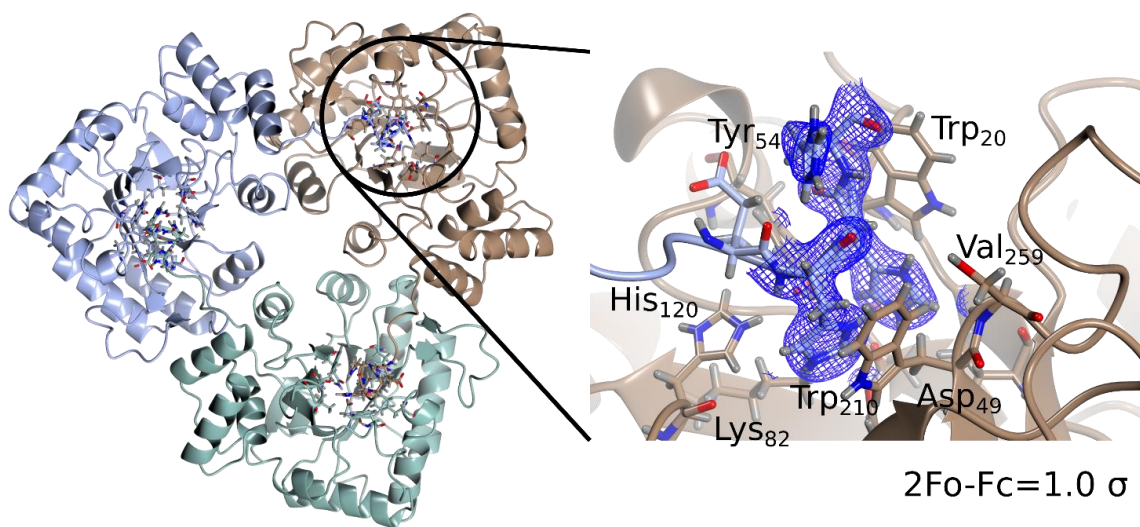

**Fig. S19: 3D structures of SmoB-pET29a showing undesirable His<sub>6</sub>-tag interactions.** SmoB (pET29 construct) showing C-terminal His<sub>6</sub>-tag (blue) from the adjoining subunit bound at the cofactor site within the physiologically-relevant trimer.

**A**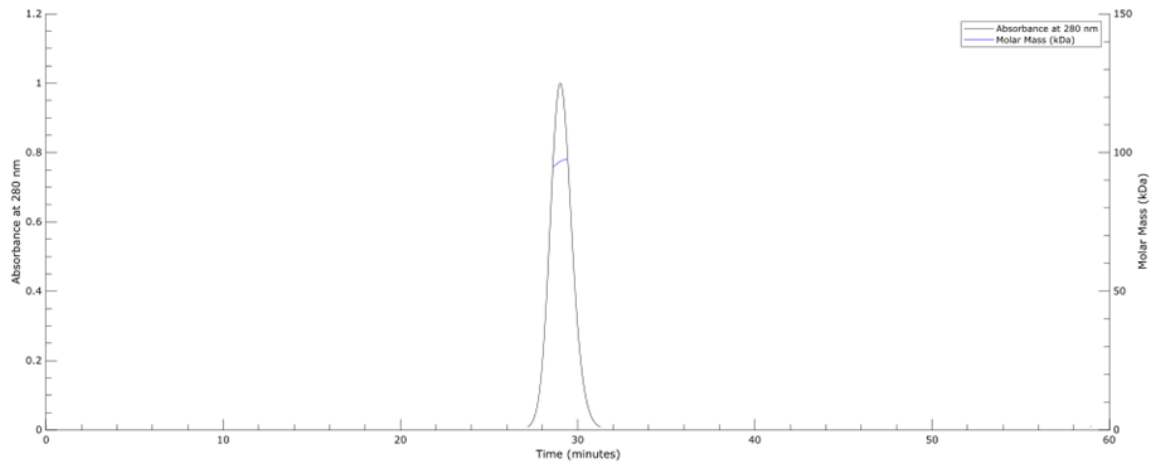**B**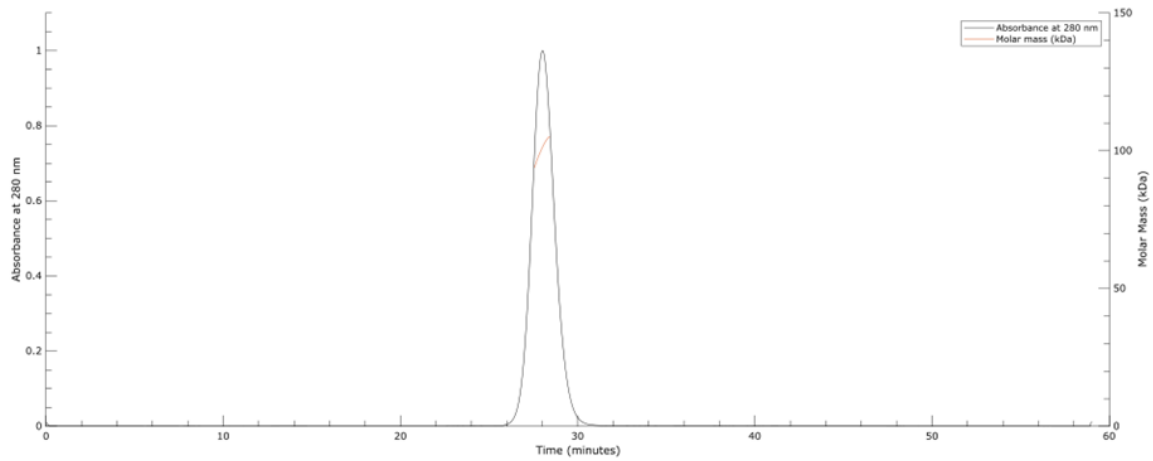

| Peak                 | from (min) | to (min) | Amount ( $\mu\text{g}$ ) | MW (kDa) |
|----------------------|------------|----------|--------------------------|----------|
| Atu3278<br>pET29a(+) | 28.6       | 31.0     | 523.5                    | 96.54    |
| Atu3278<br>YSBLIC3C  | 26.2       | 30.0     | 301                      | 100.3    |

**Fig. S20: SEC-MALS plot of SmoB.** A, pET29a(+) construct. B, YSBLIC3C construct (Molecular weight: 34 kDa). SEC-MALS plot reveals the oligomeric state of SmoB in solution. UV-trace and an average molecular weight trace (red), calculated from the refractive index and light scattering signal giving mass estimation of 96.5 and 100 kDa, respectively, which corresponds to a trimer.

## Supplementary Tables

**Table S1: Recombinant protein sequences.**

|                                                         |                                                                                                                                                                                                                                                                                                                                                                                                                                                                                                                                                                                                                                                                                                                                                                                                                                                       |
|---------------------------------------------------------|-------------------------------------------------------------------------------------------------------------------------------------------------------------------------------------------------------------------------------------------------------------------------------------------------------------------------------------------------------------------------------------------------------------------------------------------------------------------------------------------------------------------------------------------------------------------------------------------------------------------------------------------------------------------------------------------------------------------------------------------------------------------------------------------------------------------------------------------------------|
| <b>Atu3277<br/>(SmoA)</b>                               | MTVVEAIAKMPNEHVFPVGGENSRSFRNALGAFTTGVTVVTATTPEGPIGMTVNSFASVSLD<br>PPLVLWSPAKSSSRHPAFSEATHFAIHVLSADQDVLRSARFTRNGRAFDDLDWEINDEGVVP<br>IPGTLARFECRRAAAHDAGDHTIIVGEVLRRAHRDGDPLCFSGGAFGRFRSRQLEHHHHHH                                                                                                                                                                                                                                                                                                                                                                                                                                                                                                                                                                                                                                                     |
| <b>Atu3282<br/>(SmoF)</b>                               | MDAELKIFVSSQHQPDIWRKALDQYEAKTPGVKVVIEETGGNTSEMQAQYLNTVMSAKDSSL<br>DVLMLDVIRPAQFATAGWTSDFSGKDL SAYLPTYAEANTVNGKIVALPAFADSMFLYYRKD<br>LLDKYGIKPPPTWDELKEASKKVMERGEKNEPELQGLSFQGKAI EGAVCTFLLPYWSEGKSLV<br>ENGKLNFDNKA AVDSLKLWKS FVDDGISKKNI SEVATDDTRKEFQAGKVLFAVNWSYAWTH<br>FQGKESQVNDKVGVARLPAVKGGEQTTCLGGWEFGVSAYSQQDEAKKLV EYLSQDVSKF<br>MAINAALLPTYAALYKDADVTKTI PWFADALPVVETAKARPVTPRYNEVSETIRTTVNGVL<br>AGVMPEDGAKQMESRLRRVLRLEHHHHHH                                                                                                                                                                                                                                                                                                                                                                                                           |
| <b>Atu3285<br/>D455N<br/>E370A<br/>E371A<br/>(SmoI)</b> | MHFETTKDGF TIAIGNRIILSHSPDKPAFFAGFGEERMDMYRGNFDIEDYVIERTALRHA E<br>VSGDSVTLSSAPGQAPRLRLTL DGNAILRTALDE TINRLWLRVVAETDEHVWGGGEQMSYF<br>DMRGRRFP LWTSEPGVGRDKTTEITFKSDVSGKAGGDYNTNYPQPTWLS SRKYALHVETS<br>AYSVDFRNGDFHEIEI WAVPEKIEFFAGDSFADIVSALS LHFGRQPELPD VWYNGAI IGL<br>KDVNSFARLEKIRAAGTKVSGLWCE DWVGLRQTSFGARL FWDWQANDTRY PHLRQKIAEL<br>ADQGIREFLGYVNPYLCVDG PLFPVAESAGYFATD VDVGKTALVDFGEFDCGVVDFTN PAAAD<br>WFAAAIIGKNMLDFGLSGWMADFG EYLPIDIKLSNGVD AKLMHNAWPTLWAEVNAKGVESR<br>GKTGEALFFMRAGFTGVQAHCLIWGGNSVDFSRHDGLVTVICGALSSGLMGNAYHHS DI<br>GGYTSLFGNVRTAELIMRWTEMAAFT PVMRTHEGNRPRDNLQIDQDETVLAHFARMTAIYV<br>ALAPYLKSLSAEAAKTGLPVQRPLFLHYENEPQTYAVQDCYLYGADMLVAPVWKAGETQRS<br>LYLPGHGEVHLSGKRHAGGRDITVETPLGEPAVFYRADSSHRLFEQLRTIGLEHHHHHH<br>H<br>N.B. active site D455N and double surface E370A/E371A mutations are highlighted in red |
| <b>Atu3278<br/>(SmoB)<br/>in pET29</b>                  | MQRIALSDKLELSRIVYGMWRIGDDADTSPA HVQAKIEACLAQGITTMDQADIYGGYTAEA<br>ILGGGLKAAPGLRDKIEIVTKCGIVAPAGRHSSARVKHYDTTAGHINVSVEASLRDMGTDH<br>VDLLLIHRPDPLIDAEETGKALDALVASGKVKAVGVS NFRPWDFSL LQSAMSNRLVTNQIE<br>MSLLATDTFTNGDLAYLQEKRVSPMAWSP LGGGSLFSGAYGGTMAALQRIGKEQGV DATAV<br>AIAWLLRHPAKIVPVLGTNNLERIRTAADALRV TMDRQTFWELYTLAIGKEVALEHHHHHH                                                                                                                                                                                                                                                                                                                                                                                                                                                                                                               |
| <b>Atu3278<br/>(SmoB)<br/>in<br/>YSBLIC3C</b>           | MGSSHHHHHHSSGLEVL FQGPAMQRIALSDKLELSRIVYGMWRIGDDADTSPA HVQAKIEA<br>CIAQGIT TMDQADIYGGYTAEAILGGGLKAAPGLRDKIEIVTKCGIVAPAGRHSSARVKHY<br>DTTAGHINVSVEASLRDMGTDHVDLLLIHRPDPLIDAEETGKALDALVASGKVKAVGVS NFR<br>RPWDFSL LQSAMSNRLVTNQIEMSLLATDTFTNGDLAYLQEKRVSPMAWSP LGGGSLFSGA<br>YGGTMAALQRIGKEQGV DATAVAIAWLLRHPAKIVPVLGTNNLERIRTAADALRV TMDRQT<br>WFELYTLAIGKEVA                                                                                                                                                                                                                                                                                                                                                                                                                                                                                          |
| <b>Atu3279<br/>(SmoC)</b>                               | MTVVPVTSADLDAAEVSWFSALCSDDYAYLGVPDGLRSSF EHCSDIVKKAELGFRNII LC<br>PSSYQVGQDTLSFVAGCAPISDRINFLAA IRCGEMQPI MLARTVATLDHMLKGRLTLNVIS<br>SDFPGEVADSAFRYKRSHEVVEILRQAWTRDTIDHDGEIYQFKGVSTEPARPYQLNGGPLL<br>YFGYSPDALELCGAQC DVYLMWPEPKDQLADRMRAAHERAAHGR TLDYGLRVHMVVRDT<br>EQEAREYADHLVSKLDDEYQGLIRNRAHDSGSLGVSHQARARELADKFGYVEPNLWTGIGR<br>ARSGCGAALVGST DQVLSALEEYQKMGIRAFILSGYPHLDEAEHF GTKVLPQMKTC SLPHA<br>YGRVPSETPATPLNGERHLEHHHHHH                                                                                                                                                                                                                                                                                                                                                                                                                |
| <b>RoSmoA</b>                                           | MTISADITHGLNEQVFI PDASTARHYRNALGFTTGVAVVTARTPDGP IGMTVNSF TSVSL<br>DPPLVLWSPAKSSSRHRAFTAASYFVIHVL SAEQDRLSARFTRNGAGFEGLDWIENMEGV P<br>VIPGTLARFECERSDLHDAGDHTLILGRVLRRAHREGDPLCF SRGTFGRFQSH                                                                                                                                                                                                                                                                                                                                                                                                                                                                                                                                                                                                                                                          |
| <b>RoSmoC</b>                                           | MTVVPITSPDLDAAEVSWFAALCSDDYAYLGVPDDALKSSFEHCSEIVTRAETLGFRNII LC<br>PSSYQVGQDTLSFVAACSQITERINLLAA IRCGEMQPI MLARTVATLDHMLKGRLTLNVIS<br>SDFPGEVADSAFRYRSHEVVQILRQAWTRDTIDHEGEVYNFKGVTT EPARPYQNGGPLL<br>YFGYSPDALELCGAQC DVYLMWPEPKQIAERMKAVHARAEAHGR TLDYGLRVHMIVRDT<br>EKEARDYAEHLVSKLDDEYGR LIRSRAHDSTSLGVSHQARTRELADKFGYVERHLWTGIGR<br>ARSGCGAALVGST DQVLSIEI EAYKKMGVRAFI FSGYPHLDEAEHF GKKVLPQLKTC SLPHI<br>YGRVPADTPATPLGAGRRH                                                                                                                                                                                                                                                                                                                                                                                                                   |

**Table S2: Oligonucleotides used in this study.**

| <b>ssDNA</b>          |                                                                                                                                                                                                                                                                                                                                                                                                                                                                                                                                                                                                                                                                                                                                                                                                                                                                                                                                                                                                                                                                                                                                                                                                                                                                            |           |
|-----------------------|----------------------------------------------------------------------------------------------------------------------------------------------------------------------------------------------------------------------------------------------------------------------------------------------------------------------------------------------------------------------------------------------------------------------------------------------------------------------------------------------------------------------------------------------------------------------------------------------------------------------------------------------------------------------------------------------------------------------------------------------------------------------------------------------------------------------------------------------------------------------------------------------------------------------------------------------------------------------------------------------------------------------------------------------------------------------------------------------------------------------------------------------------------------------------------------------------------------------------------------------------------------------------|-----------|
| <i>Atu3277 (smoA)</i> | TTGGACATATGACAGTTGTAGAGGCAATCAAGATGC                                                                                                                                                                                                                                                                                                                                                                                                                                                                                                                                                                                                                                                                                                                                                                                                                                                                                                                                                                                                                                                                                                                                                                                                                                       | sense     |
|                       | AGGATCTCGAGTTGCCTTGAAAAACGACCGAAG                                                                                                                                                                                                                                                                                                                                                                                                                                                                                                                                                                                                                                                                                                                                                                                                                                                                                                                                                                                                                                                                                                                                                                                                                                          | antisense |
| <i>Atu3278 (smoB)</i> | TTGGACATATGCAACGTATCGCTCTTTCTGAC                                                                                                                                                                                                                                                                                                                                                                                                                                                                                                                                                                                                                                                                                                                                                                                                                                                                                                                                                                                                                                                                                                                                                                                                                                           | sense     |
|                       | AGGATCTCGAGCGCCACCTCTTTTCCAATCG                                                                                                                                                                                                                                                                                                                                                                                                                                                                                                                                                                                                                                                                                                                                                                                                                                                                                                                                                                                                                                                                                                                                                                                                                                            | antisense |
| <i>At3278-LIC3C</i>   | TTCCAGGGACCAGCAATGCAACGTATCGCTCTTTCTG                                                                                                                                                                                                                                                                                                                                                                                                                                                                                                                                                                                                                                                                                                                                                                                                                                                                                                                                                                                                                                                                                                                                                                                                                                      | sense     |
|                       | CATGCTAGCCATATGTTACGCCACCTCTTTTCCAATC                                                                                                                                                                                                                                                                                                                                                                                                                                                                                                                                                                                                                                                                                                                                                                                                                                                                                                                                                                                                                                                                                                                                                                                                                                      | antisense |
| <i>Atu3279 (smoC)</i> | TTGGACATATGACCGTCGTACCCGTTACATCTG                                                                                                                                                                                                                                                                                                                                                                                                                                                                                                                                                                                                                                                                                                                                                                                                                                                                                                                                                                                                                                                                                                                                                                                                                                          | sense     |
|                       | AGGATCTCGAGGTGGCGTTCCCCGTTGCCG                                                                                                                                                                                                                                                                                                                                                                                                                                                                                                                                                                                                                                                                                                                                                                                                                                                                                                                                                                                                                                                                                                                                                                                                                                             | antisense |
| <i>Atu3282 (smoF)</i> | TTGGACATATGGACGCCGAACGAAAAATCTTCG                                                                                                                                                                                                                                                                                                                                                                                                                                                                                                                                                                                                                                                                                                                                                                                                                                                                                                                                                                                                                                                                                                                                                                                                                                          | sense     |
|                       | AGGATCTCGAGTCTCAGAACGCGCCGCAGACG                                                                                                                                                                                                                                                                                                                                                                                                                                                                                                                                                                                                                                                                                                                                                                                                                                                                                                                                                                                                                                                                                                                                                                                                                                           | antisense |
| <b>dsDNA</b>          |                                                                                                                                                                                                                                                                                                                                                                                                                                                                                                                                                                                                                                                                                                                                                                                                                                                                                                                                                                                                                                                                                                                                                                                                                                                                            |           |
| <i>RoSmoA</i>         | TGTA AACGACGCGCCAGTCATATGACCATCTCCG CAGATATCACCCACGGCCTGAACG AACAGGTGTTTATTCGGGATGCCAGCACCGCTCGTCATTATCGCAACGCGCTGGGCAC GTTTACCACCGCGTTCGCGGTGGTGACCGCCGCACGCCGACGGCCCGATTGGCATG ACGGTGAACAGCTTTACCAGCGTGAGCCTCGATCCGCCGCTGGTGCTGTGGAGCCCGG CGAAAAGCAGTAGCCGCCATCGCGCGTTTACGGCGGCGAGCTACTTTGTGATTCATGT GCTGAGCGCGGAACAGGATCGTCTGAGCGCGCGTTTACCCGTAACGGCGCGGGCTTC GAAGGCCTGGACTGGATTGAAAATATGGAAGGCGTGCCGGTGATCCCGGGCACGCTGG CGCGTTTTGAATGCGAACGCAGCGATCTGCATGATGCCGGTGATCATACCCTGATTCT GGGCCGCGTGCTGCGCGCGGCGCATCGTGAAGGTGATCCGCTGTGCTTTAGCCGCGGC ACCTTTGGCCGCTTTCAGAGCCATCTCGAGCCGCTGAGCAATAACTAGC                                                                                                                                                                                                                                                                                                                                                                                                                                                                                                                                                                                                                                                                        |           |
| <i>RoSmoC</i>         | TGTA AACGACGCGCCAGTCATATGACCGTGGTACCGATCACCTCCCCGGATCTGGATG CTGCTGAGGTGAGTTGGTTTTGCGGCGCTCTGTTTACAGATGATTATGCGTATCTGGGTGT CCCAGATGATGCCCTGAAATCATCGTTTTGAACATTGCTCGGAGATTGTGACCCGTGCA GAAACGTTAGGTTTTTCGGAATATTCTATGTCCAGTTTCGTATCAGGTTGGCCAGGATA CCCTGTCTTTTCGTAGCGGCATGCAGCCAGATTACGGAACGTATTAACCTTTTGGCGGC GATCCGTTGCGGTGAAATGCAGCCTATTATGCTGGCCCGTACCGTAGCGACACTGGAT CACATGTTGAAAGGCCCGCCTGACTTTGAACGTGATTAGCAGCGATTTTCCGGGTGAAG TGGCGGATAGCGCGTTCCGCTATCGCCGTAGCCACGAAGTGGTGCAGATTCTGCGCCA GGCCTGGACCCGTGATACGATTGATCATGAAGGCGAGGTATATAATTTCAAAGGTGTG ACCACCGAACCGGCACGTCCGTACCAGCAGAACGGCGGCCCCGCTGCTGTATTTTGGCG GCTATTCACCAGACGCGCTGGAACGTGCGGGGCACAGTGTGATGTGTACCTGATGTG GCCTGAACCGAAAGAACAGATTGCGGAACGCATGAAAGCCGTCCACGCGCGTGCGGAA GCGCCAGCGCCGACGCTGGATTACGGCCTGCGTGTTTACATGATCGTTCGCGATACCG AAAAAGAAGCGCGTGATTATGCGGAACATCTGGTCAGCAAACCTGGACGATGAATATGG TAGATTAATTCGCAGTCGTGCCATGATTCCACGAGCCTGGGCGTGAGCCACCAGGCA CGCACCCGCGAACTGGCCGATAAATTCGGCTACGTTGAACGTCACTGTGGACCGGCA TTGGCCGCGCCCGCAGCGGCTGTGGGGCGGCTCTGGTCGGCAGCACCGACCGAGTTCT GTCCGAAATCGAAGCCTATAAAAAAATGGGCGTTTCGTGCGTTTTATTTTTAGCGGTTAT CCGCACTTAGATGAAGCAGAACATTTTGGTAAAAAAGTTTTACCAGTTAAAAACCT GTAGCCTGCCGCATATTTATGGTCGTGTGCCGCTGATACCCCGGCACCCCGTTAGG TGCGGGTCGTCGTCATCTCGAGCCGCTGAGCAATAACTAGC |           |

**Table S3: Parameters used for ITC and the thermodynamic terms determined for ligand binding to SmoB (Atu3277), SmoC (Atu3279) and SmoF (Atu3282).** Errors are provided as standard deviations (n=3).

| Protein<br>(30 $\mu$ M) | ligand | Conc.<br>( $\mu$ M) | T ( $^{\circ}$ C) | n               | $K_d$<br>( $\mu$ M) | $\Delta H$<br>(kcal mol $^{-1}$ ) | $\Delta S$<br>(cal $\cdot$ mol $^{-1}$ $\cdot$ K $^{-1}$ ) | -T $\Delta S$<br>(kcal $\cdot$ mol $^{-1}$ ) | $\Delta G$<br>(kcal $\cdot$ mol $^{-1}$ ) |
|-------------------------|--------|---------------------|-------------------|-----------------|---------------------|-----------------------------------|------------------------------------------------------------|----------------------------------------------|-------------------------------------------|
| SmoC                    | SQ     | 600                 | 25                | 0.81 $\pm$ 0.06 | 3.27 $\pm$ 1.20     | -4.17 $\pm$ 0.26                  | 10.06 $\pm$ 1.53                                           | -3.00 $\pm$ 0.46                             | -7.17 $\pm$ 0.52                          |
| SmoF                    | SQGro  | 200                 | 25                | 0.85 $\pm$ 0.04 | 0.29 $\pm$ 0.17     | -11.21 $\pm$ 0.40                 | -7.44 $\pm$ 2.26                                           | 2.22 $\pm$ 0.67                              | -9.00 $\pm$ 0.78                          |
| SmoB                    | NADH   | 1000                | 25                | -               | -                   | -                                 | -                                                          | -                                            | -                                         |
| SmoB                    | NADPH  | 0.35                | 25                | 0.76 $\pm$ 0.01 | 1.22 $\pm$ 0.04     | -24.25 $\pm$ 0.74                 | -54.34 $\pm$ 2.42                                          | 16.2 $\pm$ 0.72                              | -8.07 $\pm$ 0.04                          |



**Table S4: Data collection and refinement statistics for crystal structures of SmoF (Atu3282) and SmoI (Atu3285).** Numbers in brackets refer to data for highest resolution shells.

|                                     | <b>Atu3285-<br/>D455N•SQGro</b> | <b>Atu3282-apo</b>  | <b>Atu3282•SQGro</b>     |
|-------------------------------------|---------------------------------|---------------------|--------------------------|
| Data collection                     |                                 |                     |                          |
| Space group                         | P 1 21 1                        | <i>P 1</i>          | P 1 21 1                 |
| Cell dimensions                     |                                 |                     |                          |
| <i>a</i> , <i>b</i> , <i>c</i> (Å)  | 97.53, 168.40, 100.69           | 54.21, 78.02, 83.32 | 53.80 137.80 54.07       |
| $\alpha$ , $\beta$ , $\gamma$ (°)   | 90.0, 116.53, 90.0              | 109.0,106.9,104.7   | 90.0, 118.70, 90.0       |
| Resolution (Å)                      | 61.51-2.15 (2.19-2.15)          | 1.30                | 47.19-1.70 (1.73-1.70)   |
| $R_{\text{merge}}$                  | 0.077 (0.538)                   | 0.040(0.515)        | 0.067 (0.709)            |
| $R_{\text{pim}}$                    | 0.077 (0.534)                   | 0.040(0.515)        | 0.064 (0.674)            |
| <i>I</i> / $\sigma I$               | 8.1 (1.6)                       | 8.9(1.1)            | 9.8 (1.4)                |
| Completeness (%)                    | 97.4 (98.9)                     | 99.1(67.5)          | 98.3 (96.8)              |
| Redundancy                          | 2.9 (2.9)                       | 2.1(1.6)            | 3.4 (3.4)                |
| Refinement                          |                                 |                     |                          |
| Resolution (Å)                      | 2.15                            | 1.30                | 47.19-1.70               |
| No. unique reflections              | 145522                          | 270846              | 74,272                   |
| $R_{\text{work}} / R_{\text{free}}$ | 0.1946/0.2235                   | 0.18/0.20           | 0.1494/0.1832            |
| No. atoms                           |                                 |                     |                          |
| Protein                             | 20405                           | 8977                | 6,096                    |
| Ligand/ion                          | 80                              | 8                   | 40 (SQG), 40 (EDG)       |
| Water                               | 439                             | 1470                | 573                      |
| <i>B</i> -factors (Å <sup>2</sup> ) |                                 |                     |                          |
| Protein                             | 31.38                           | 16.6                | 24.4                     |
| Ligand/ion                          | 22.24                           | 30.7                | 14.8 (SQGro); 39.6 (EDG) |
| Water                               | 23.37                           | 27.6                | 37.6                     |
| R.m.s. deviations                   |                                 |                     |                          |
| Bond lengths (Å)                    | 0.0143                          | 0.0135              | 0.006                    |
| Bond angles (°)                     | 1.81                            | 1.911               | 0.776                    |
| Ramachandran Plot Residues          |                                 |                     |                          |
| In most favourable regions (%)      | 96.56                           | 98.61               | 99.35                    |
| In allowed regions (%)              | 3.1                             | 1.29                | 0.65                     |
| Outliers                            | 0.34                            | 0                   | 0                        |
| <b>PDB code</b>                     | <b>7OFX</b>                     | <b>7NBZ</b>         | <b>7OFY</b>              |

**Table S5: Data collection and refinement statistics for crystal structures of SQ monooxygenases SmoC (Atu3279) from *Agrobacterium tumefaciens* and RoSmoC from *Rhizobium oryzae*.**

Numbers in brackets refer to data for highest resolution shells.

|                                       | <b>RoSmoC</b>                                  | <b>Atu3279</b>         |
|---------------------------------------|------------------------------------------------|------------------------|
| Data collection                       |                                                |                        |
| Space group                           | P 2 <sub>1</sub> 2 <sub>1</sub> 2 <sub>1</sub> | P62 2 2                |
| Cell dimensions                       |                                                |                        |
| <i>a</i> , <i>b</i> , <i>c</i> (Å)    | 71.16, 100.40, 104.65                          | 203.76 203.76 110.73   |
| $\alpha$ , $\beta$ , $\gamma$ (°)     | 90, 90, 90                                     | 90, 90, 120            |
| Resolution (Å)                        | 72.45 - 1.9 (1.94-1.90)                        | 48.94-3.40 (3.67-3.40) |
| R <sub>merge</sub>                    | 0.165 (1.739)                                  | 0.117 (0.344)          |
| R <sub>pim</sub>                      | 0.067 (0.709)                                  | 0.042 (0.173)          |
| <i>I</i> / $\sigma$ <i>I</i>          | 12.7 (3.6)                                     | 16 (5.1)               |
| Completeness (%)                      | 100.0 (100.0)                                  | 99.9 (99.9)            |
| Redundancy                            | 13.4 (13.8)                                    | 15.8 (8.9)             |
| Refinement                            |                                                |                        |
| Resolution (Å)                        | 72.01-1.90                                     | 48.00-3.40             |
| No. unique reflections                | 59830 (3774)                                   | 19137 (3864)           |
| R <sub>work</sub> / R <sub>free</sub> | 0.1673/0.1961                                  | 0.2179/0.2615          |
| No. atoms                             |                                                |                        |
| Protein                               | 5558                                           | 5392                   |
| Ligand/ion                            | -                                              | -                      |
| Water                                 | 491                                            | -                      |
| <i>B</i> -factors (Å <sup>2</sup> )   |                                                |                        |
| Protein                               | 25.65                                          | 85.03                  |
| Ligand/ion                            | -                                              | -                      |
| Water                                 | 31.05                                          | -                      |
| R.m.s. deviations                     |                                                |                        |
| Bond lengths (Å)                      | 0.01473                                        | 0.0105                 |
| Bond angles (°)                       | 1.80                                           | 2.01                   |
| Ramachandran Plot Residues            |                                                |                        |
| In most favourable regions (%)        | 95.96                                          | 91.92                  |
| In allowed regions (%)                | 4.04                                           | 7.40                   |
| Outliers                              | 0.0                                            | 0.68                   |
| <b>PDB code</b>                       | <b>7OH2</b>                                    | <b>7OLF</b>            |

**Table S6: Data collection and refinement statistics for 6-oxo-glucose reductase SmoB (Atu3278) structures.** Numbers in brackets refer to data for highest resolution shells.

|                                     | <b>Atu3278-apo<br/>(YSBLIC3C)</b> | <b>Atu3278•<br/>NADPH</b> | <b>Atu3278•NADP<br/>H•Glc</b> | <b>Atu3278-apo<br/>(pET29a)</b> |
|-------------------------------------|-----------------------------------|---------------------------|-------------------------------|---------------------------------|
| <b>Data collection</b>              |                                   |                           |                               |                                 |
| Space group                         | C 2 2 2 <sub>1</sub>              | P 6 <sub>3</sub>          | P 6 <sub>3</sub>              | P 2 <sub>1</sub> 3              |
| Cell dimensions                     |                                   |                           |                               |                                 |
| <i>a, b, c</i> (Å)                  | 89.34, 137.6,<br>153.8            | 82.93, 82.93,<br>77.52    | 82.85, 82.85,<br>77.26        | 108.93, 108.93,<br>108.93       |
| $\alpha, \beta, \gamma$ (°)         | 90,90,90                          | 90,90,120                 | 90,90,120                     | 90,90,90                        |
| Resolution (Å)                      | 1.77                              | 1.27                      | 1.50                          | 1.83                            |
| $R_{\text{merge}}$                  | 0.120(1.877)                      | 0.108(0.932)              | 0.079(1.548)                  | 0.189(4.196)                    |
| $R_{\text{pim}}$                    | 0.064(0.99)                       | 0.046(0.799)              | 0.035(0.801)                  | 0.039(0.865)                    |
| $I / \sigma I$                      | 11.2(1.2)                         | 9.6(0.6)                  | 14.7(1.4)                     | 14.1(1.0)                       |
| Completeness (%)                    | 100(100)                          | 98.6(85.5)                | 100(99.9)                     | 100(100)                        |
| Redundancy                          | 8.4(8.3)                          | 10.1(3.2)                 | 11.9(9.0)                     | 24.5(24.9)                      |
| <b>Refinement</b>                   |                                   |                           |                               |                                 |
| Resolution (Å)                      | 1.77                              | 1.27                      | 1.50                          | 1.83                            |
| No. unique reflections              | 92215                             | 78502                     | 48123                         | 38208                           |
| $R_{\text{work}} / R_{\text{free}}$ | 0.18/0.21                         | 0.18/0.20                 | 0.17/0.19                     | 0.24/0.27                       |
| No. atoms                           |                                   |                           |                               |                                 |
| Protein                             | 6698                              | 2179                      | 2178                          | 2237                            |
| Ligand/ion                          | 0                                 | 48                        | 60                            | 10                              |
| Water                               | 536                               | 307                       | 230                           | 183                             |
| $B$ -factors (Å <sup>2</sup> )      |                                   |                           |                               |                                 |
| Protein                             | 29.06                             | 17.71                     | 22.22                         | 34.32                           |
| Ligand/ion                          | -                                 | 15.67                     | 24.01                         | 54.13                           |
| Water                               | 32.23                             | 28.9                      | 31.67                         | 37.34                           |
| R.m.s. deviations                   |                                   |                           |                               |                                 |
| Bond lengths (Å)                    | 0.0151                            | 0.0178                    | 0.0120                        | 0.0145                          |
| Bond angles (°)                     | 1.90                              | 2.11                      | 1.73                          | 1.810                           |
| Ramachandran Plot Residues          |                                   |                           |                               |                                 |
| In most favourable regions (%)      | 97.97                             | 98.96                     | 99.31                         | 97.97                           |
| In allowed regions (%)              | 2.03                              | 1.04                      | 0.69                          | 1.36                            |
| Outliers                            | 0                                 | 0                         | 0                             | 2                               |
| <b>PDB code</b>                     | <b>7BBZ</b>                       | <b>7BC0</b>               | <b>7BC1</b>                   | <b>7BBY</b>                     |

**Table S7: Glucose fragmentation data (for aldonitrile pentapropionate glucose).**

| <b>sugar</b> | <b>retention time</b> | <b>ion m/z</b> | <b>relevant carbons</b> |
|--------------|-----------------------|----------------|-------------------------|
| glucose      | 17.52                 | 259            | 4,5,6                   |
| glucose      | 17.52                 | 284            | 1,2,3,4                 |
| glucose      | 17.52                 | 173            | 5,6                     |
| glucose      | 17.52                 | 370            | 1,2,3,4,5               |
